# Supplementary material for: Dietary Flavonoid Intakes in France Are Linked to Brewed Tea Consumption and to Socioeconomic Status: Analyses of the Third French Individual and National Food Consumption (INCA3) Survey for Children and Adults
Source: MDPI journal article supplement (doi:10.3390/nu16081118), 2024-04-10
Supplement: s1 [file s1]

**Table S1:** Food groups, number of food items per food group and flavonoids status

|                                             | N   | N not containing<br>flavonoids | N containing<br>flavonoids |
|---------------------------------------------|-----|--------------------------------|----------------------------|
| Tea                                         | 4   | 1                              | 3                          |
| Fruits, nuts and seeds                      | 163 | 70                             | 93                         |
| Alcoholic beverages                         | 138 | 65                             | 73                         |
| Fruit and vegetable juices                  | 11  | 7                              | 4                          |
| Chocolate confectionery                     | 64  | 52                             | 12                         |
| Sugar, honey, jam, syrup                    | 63  | 60                             | 3                          |
| Dairy products and substitutes              | 367 | 356                            | 11                         |
| Vegetables                                  | 159 | 83                             | 76                         |
| Coffee and herbal teas                      | 31  | 22                             | 9                          |
| Legumes                                     | 18  | 12                             | 6                          |
| Potatoes and other tubers                   | 19  | 11                             | 8                          |
| Condiments, spices and sauces               | 218 | 181                            | 37                         |
| Meat, meat products and substitutes         | 298 | 292                            | 6                          |
| Carbonated soft isotonic drinks             | 25  | 23                             | 2                          |
| Cereals and cereal products                 | 228 | 218                            | 10                         |
| Fats and oils                               | 50  | 49                             | 1                          |
| Miscellaneous                               | 19  | 18                             | 1                          |
| Confectionery non chocolate                 | 46  | 46                             | 0                          |
| Mixed dishes based on cereals               | 137 | 137                            | 0                          |
| Based on fish and<br>crustaceans/mollusks   | 33  | 33                             | 0                          |
| Based on meat and meat products             | 70  | 70                             | 0                          |
| Based on vegetables (including<br>potatoes) | 59  | 59                             | 0                          |
| Cakes and sweet biscuits                    | 292 | 292                            | 0                          |
| Eggs and egg products                       | 16  | 16                             | 0                          |
| Fish, shellfish                             | 137 | 137                            | 0                          |
| Salty snacks                                | 105 | 105                            | 0                          |
| Soups                                       | 23  | 23                             | 0                          |
| Others non alcoholic beverages              | 10  | 10                             | 0                          |
| Waters                                      | 32  | 32                             | 0                          |

**Table S2:** Distribution of tea flavonoid intake percentiles. Data for the total adult (N = 2121) and children (N = 1775) population.

|           |                                             | P5  | P15 | P25 | P50 | P75   | P85   | P95   |
|-----------|---------------------------------------------|-----|-----|-----|-----|-------|-------|-------|
| Adults    | All                                         | 0.0 | 0.0 | 0.0 | 0.0 | 74.2  | 210.8 | 473.3 |
| Gender    | Men                                         | 0.0 | 0.0 | 0.0 | 0.0 | 0.0   | 117.1 | 436.4 |
|           | Women                                       | 0.0 | 0.0 | 0.0 | 0.0 | 154.3 | 281.2 | 549.3 |
| Age       | 18-44 yo                                    | 0.0 | 0.0 | 0.0 | 0.0 | 64.5  | 190.4 | 473.3 |
|           | 45-64 yo                                    | 0.0 | 0.0 | 0.0 | 0.0 | 108.8 | 225.1 | 476.1 |
|           | 65-79 yo                                    | 0.0 | 0.0 | 0.0 | 0.0 | 68.0  | 222.2 | 514.3 |
| ICU       | <900 €/m/CU                                 | 0.0 | 0.0 | 0.0 | 0.0 | 0.0   | 129.1 | 462.8 |
|           | [900-1 340[ €/m/CU                          | 0.0 | 0.0 | 0.0 | 0.0 | 54.4  | 190.4 | 436.4 |
|           | [1 340-1 850[ €/m/CU                        | 0.0 | 0.0 | 0.0 | 0.0 | 131.5 | 229.9 | 491.0 |
|           | >=1 850 €/m/CU                              | 0.0 | 0.0 | 0.0 | 0.0 | 120.8 | 258.1 | 494.3 |
|           | Unknown                                     | 0.0 | 0.0 | 0.0 | 0.0 | 111.6 | 369.9 | 598.4 |
| SPC       | Low                                         | 0.0 | 0.0 | 0.0 | 0.0 | 37.6  | 138.8 | 367.0 |
|           | Medium                                      | 0.0 | 0.0 | 0.0 | 0.0 | 129.4 | 316.0 | 518.8 |
|           | High                                        | 0.0 | 0.0 | 0.0 | 0.0 | 168.9 | 360.8 | 504.4 |
| Education | Not Working                                 | 0.0 | 0.0 | 0.0 | 0.0 | 42.5  | 180.7 | 473.2 |
|           | Doesn't know ; No answer                    | 0.0 | 0.0 | 0.0 | 0.0 | 0.0   | 0.0   | 0.0   |
|           | Primary & middle school                     | 0.0 | 0.0 | 0.0 | 0.0 | 0.0   | 114.1 | 393.4 |
|           | High school                                 | 0.0 | 0.0 | 0.0 | 0.0 | 102.0 | 229.7 | 480.0 |
|           | 1 to 3 years of post-secondary education    | 0.0 | 0.0 | 0.0 | 0.0 | 168.1 | 316.0 | 515.9 |
| BMI       | 4 or more years of post-secondary education | 0.0 | 0.0 | 0.0 | 0.0 | 172.8 | 364.9 | 562.8 |
|           | Unknown                                     | 0.0 | 0.0 | 0.0 | 0.0 | 0.0   | 0.0   | 0.0   |
|           | Thinness                                    | 0.0 | 0.0 | 0.0 | 0.0 | 277.7 | 504.4 | 560.5 |
|           | Normal                                      | 0.0 | 0.0 | 0.0 | 0.0 | 118.9 | 263.5 | 508.2 |
|           | Overweight                                  | 0.0 | 0.0 | 0.0 | 0.0 | 54.4  | 167.8 | 462.8 |
|           | Obesity                                     | 0.0 | 0.0 | 0.0 | 0.0 | 0.0   | 170.6 | 363.4 |
| Children  | Morbid obesity                              | 0.0 | 0.0 | 0.0 | 0.0 | 0.0   | 54.4  | 270.8 |
|           | All                                         | 0.0 | 0.0 | 0.0 | 0.0 | 0.0   | 0.0   | 0.0   |

**Table S3:** Distribution of tea flavonoid intake percentiles. Data for adult tea drinkers (N = 758) and children tea drinkers (N = 83) only.

|           |                                             | P5   | P15   | P25   | P50   | P75   | P85   | P95   |
|-----------|---------------------------------------------|------|-------|-------|-------|-------|-------|-------|
| Adults    | All                                         | 30.9 | 63.5  | 84.9  | 199.4 | 393.4 | 477.2 | 598.4 |
| Gender    | Men                                         | 27.2 | 54.4  | 73.7  | 167.8 | 373.3 | 463.4 | 560.3 |
|           | Women                                       | 37.6 | 64.5  | 103.1 | 215.4 | 396.7 | 514.3 | 608.3 |
| Age       | 18-44 yo                                    | 33.6 | 63.5  | 78.2  | 190.4 | 380.8 | 476.1 | 581.9 |
|           | 45-64 yo                                    | 30.9 | 54.4  | 97.8  | 202.2 | 393.4 | 463.8 | 739.6 |
|           | 65-79 yo                                    | 22.4 | 63.5  | 102.2 | 222.2 | 462.8 | 552.1 | 636.3 |
| ICU       | <900 €/m/CU                                 | 37.6 | 54.4  | 78.2  | 190.4 | 420.3 | 477.2 | 560.5 |
|           | [900-1 340[ €/m/CU                          | 21.5 | 54.4  | 79.3  | 202.6 | 433.1 | 439.2 | 562.8 |
|           | [1 340-1 850[ €/m/CU                        | 50.4 | 68.0  | 102.0 | 196.8 | 351.4 | 473.2 | 762.6 |
|           | >=1 850 €/m/CU                              | 30.9 | 60.2  | 91.9  | 182.8 | 399.4 | 480.0 | 595.1 |
|           | Unknown                                     | 30.9 | 54.4  | 108.8 | 251.9 | 514.3 | 598.4 | 598.4 |
| SPC       | Low                                         | 21.5 | 63.5  | 79.3  | 190.4 | 269.2 | 458.6 | 560.5 |
|           | Medium                                      | 30.9 | 54.4  | 78.16 | 216.5 | 436.4 | 502.2 | 762.6 |
|           | High                                        | 51.6 | 74.2  | 114.6 | 205.1 | 420.0 | 504.4 | 598.4 |
|           | Not Working                                 | 22.4 | 59.2  | 76.6  | 190.4 | 376.5 | 492.1 | 636.2 |
| Education | Primary & middle school                     | 19.8 | 52.1  | 66.1  | 190.4 | 360.8 | 436.4 | 608.3 |
|           | High school                                 | 30.9 | 68.0  | 113.6 | 206.4 | 458.6 | 480.0 | 658.9 |
|           | 1 to 3 years of post-secondary education    | 30.9 | 64.5  | 78.2  | 214.9 | 380.8 | 504.4 | 574.4 |
|           | 4 or more years of post-secondary education | 54.4 | 74.2  | 122.5 | 182.8 | 445.6 | 506.6 | 673.3 |
| BMI       | Thinness                                    | 53.5 | 224.4 | 371.6 | 560.5 | 566.1 | 622.0 | 651.3 |
|           | Normal                                      | 76.2 | 160.0 | 202.1 | 379.0 | 546.8 | 653.4 | 844.7 |
|           | Overweight                                  | 86.8 | 133.5 | 168.6 | 335.2 | 471.4 | 625.5 | 923.9 |
|           | Obesity                                     | 54.8 | 118.1 | 179.6 | 217.6 | 535.8 | 625.2 | 838.1 |
|           | Morbid obesity                              | 91.2 | 133.4 | 145.1 | 250.7 | 324.8 | 383.3 | 551.7 |
| Children  | All                                         | 34.1 | 43.4  | 54.4  | 75.3  | 153.8 | 243.7 | 312.5 |
